# Supplementary material
Source: publisher figshare collection journal article supplement (https://tandf.figshare.com/ndownloader/files/12979619)
Supplement: Supplementary file 1 [file 12979619]

|  | All subjects  N=174 | Normal  N=99 | Elevated  N=75 | p-value |
| --- | --- | --- | --- | --- |
| Asthma | 48 (28%) | 20 (27%) | 28 (28%) | 0.813 |
| Atopy | 98 (56%) | 42 (56%) | 56 (57%) | 0.941 |
| CRP (mg/L) | 0.50 [0.40, 0.80] | 0.50 [0.40, 0.90] | 0.50 [0.40, 0.80] | 0.864 |
| Leptin (pg/ml) | 5999 [2643, 12270] | 6748 [3174, 15117] | 5766 [2433, 10878] | 0.189 |
| FEV1 | 2.26 ± 0.38 | 2.23 ± 0.40 | 2.28 ± 0.35 | 0.317 |
| FEV1 (%) | 94 ± 12 | 95 ± 12 | 94 ± 11 | 0.627 |
| FVC | 2.43 ± 0.44 | 2.39 ± 0.48 | 2.47 ± 0.41 | 0.262 |
| FVC (%) | 85 ± 13 | 86 ± 13 | 85 ± 12 | 0.798 |
| FEV1:FVC ratio | 0.96 [0.88, 0.99] | 0.94 [0.90, 0.99] | 0.96 [0.88, 0.98] | 0.321 |
| FEV1:FVC (%) ratio | 1.14 [1.04, 1.17] | 1.13 [1.04, 1.17] | 1.14 [1.03, 1.17] | 0.908 |

Table S1: Outcome measures of the study cohort in the normal (<90th centile) and elevated (>90th centile) umbilical artery Doppler (UAD) pulsatility index (PI) [Reported as N (%), or Mean ± Standard deviation, or Median [1st quartile, 3rd quartile]]

|  | Crude | | | Adjusted* | | |
| --- | --- | --- | --- | --- | --- | --- |
| OR | 95% CI | p | OR | 95% CI | p |
| Asthma | 0.92 | 0.47, 1.81 | 0.80 | 0.77 | 0.37, 1.58 | 0.47 |
| Atopy | 1.01 | 0.55, 1.86 | 0.98 | 0.90 | 0.48, 1.71 | 0.75 |

Table S2: Association of asthma and atopy with the presence of an elevated umbilical artery Doppler pulsatility index >90% pre- and *post- adjustment for smoking exposure, age, gender, birth-weight and Townsend score [CI=confidence interval OR=odds ratio].
